# Supplementary material
Source: PubMed Central journal article supplement (PMC4922084)
Supplement: JCM.00364-16_zjm999095013so1.pdf [file JCM.00364-16_zjm999095013so1.pdf]

Figure S1

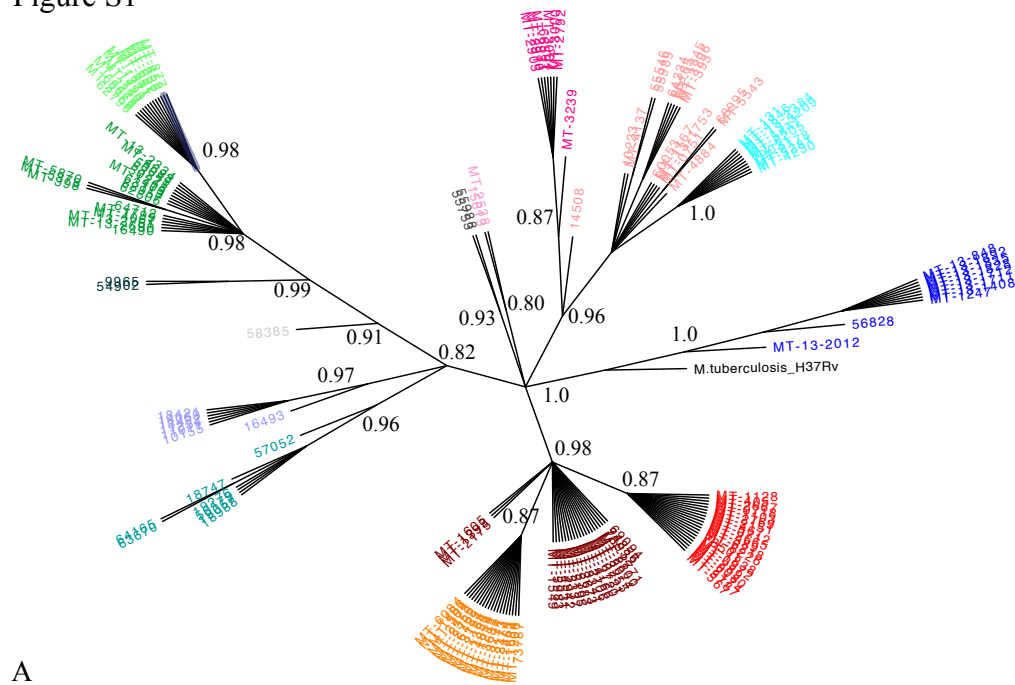

A

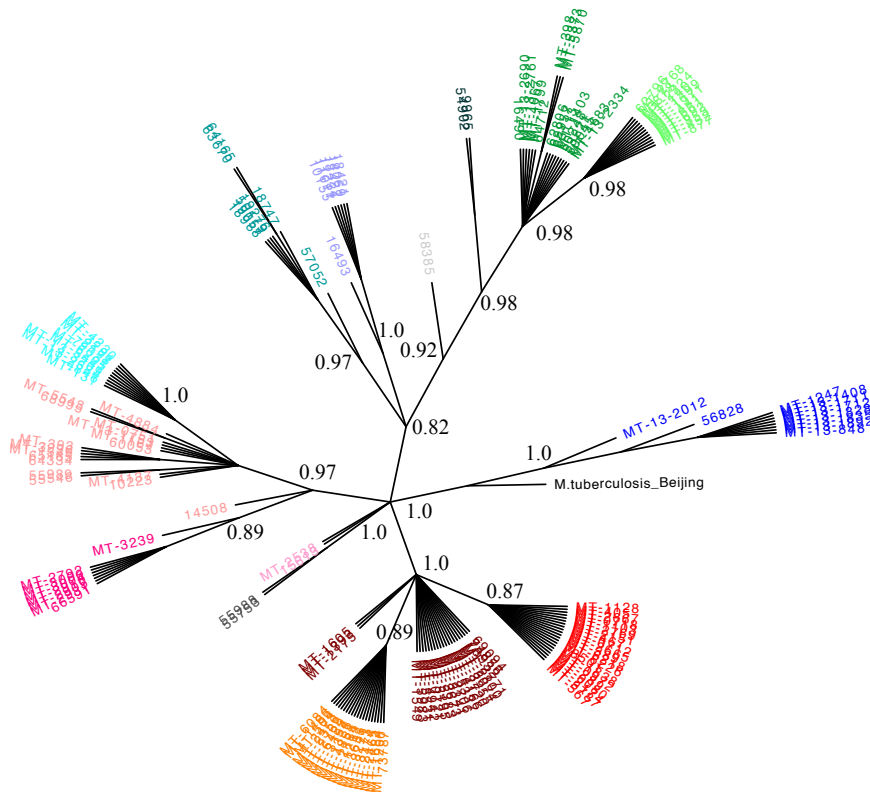

B

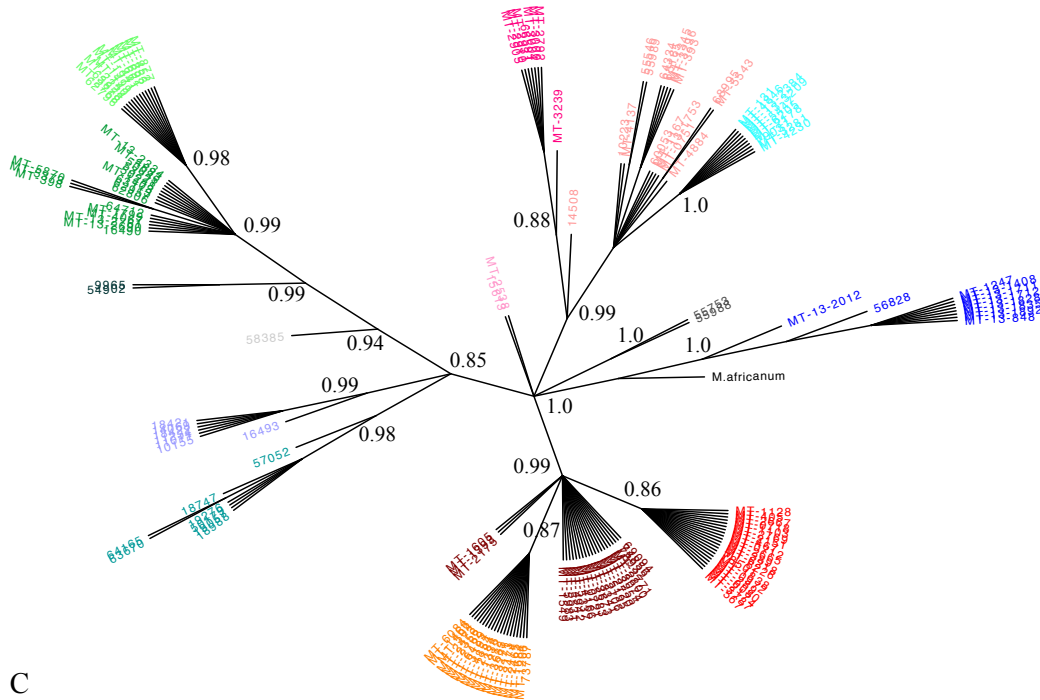

C

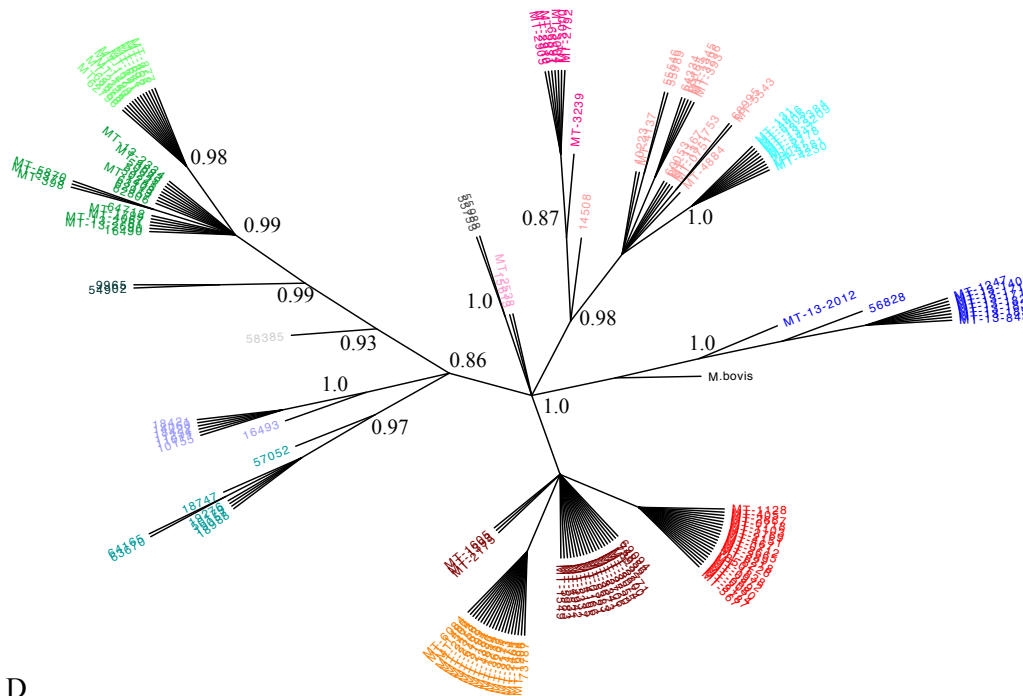

D

**Legend.** Maximum likelihood trees with 1000 bootstrap replicates, with branches below an 80% bootstrap threshold collapsed (branch lengths are therefore not to scale). For clarity, bootstrap p values are indicated only for the most proximal node defining each cluster. Each tree was rooted on its respective reference. Isolates were coloured for their respective clusters identified according to CDC1551 (and H37Rv (1)). Isolates were then kept the same colour across all panels, to facilitate quick comparison between the new reference analysis and CDC1551. See Table S4 for cluster names. A – Reference *M. tuberculosis* Lineage 4 H37Rv, using the Tamura 3-parameter model (2) of nucleotide substitution with 1,405 SNP loci. B – Reference *M. tuberculosis* Lineage 2 CCDC5079, using the General Time Reversible (3) model of nucleotide substitution with 2,048 SNP loci. C – Reference *M. africanum* (Lineage 1), using the Tamura 3-parameter model of nucleotide substitution with 2,721 SNP loci. D – Reference *M. bovis*, using the GTR model of nucleotide substitution with 2,803 SNP loci.
