# Supplementary material
Source: PubMed Central journal article supplement (PMC4922084)
Supplement: JCM.00364-16_zjm999095013so3.pdf [file JCM.00364-16_zjm999095013so3.pdf]

**TABLE S2** Genome coverage for each isolate

| Isolate | Genome coverage (%) at 1x depth by reference genome |                                       |                                       |                     |                 |                    |                    |
|---------|-----------------------------------------------------|---------------------------------------|---------------------------------------|---------------------|-----------------|--------------------|--------------------|
|         | <i>M. tuberculosis</i> ,<br>lineage 4               | <i>M. tuberculosis</i> ,<br>lineage 4 | <i>M. tuberculosis</i> ,<br>lineage 2 | <i>M. africanum</i> | <i>M. bovis</i> | <i>M. canettii</i> | <i>M. kansasii</i> |
|         | H37Rv                                               | CDC1551                               | CCDC5079                              | GN041182            | AF2122/97       | CIPT<br>140010059  | ATCC<br>12478      |
| 9965    | 98.86                                               | 99.25                                 | 98.75                                 | 98.88               | 99.27           | 95.04              | 34.63              |
| 10155   | 98.90                                               | 99.34                                 | 98.78                                 | 98.92               | 99.32           | 95.04              | 34.20              |
| 10223   | 98.70                                               | 99.13                                 | 98.80                                 | 98.94               | 99.19           | 95.12              | 34.90              |
| 11011   | 98.92                                               | 99.35                                 | 98.80                                 | 98.94               | 99.34           | 95.06              | 34.35              |
| 11234   | 98.83                                               | 99.25                                 | 98.71                                 | 98.84               | 99.26           | 94.99              | 33.66              |
| 14069   | 98.91                                               | 99.34                                 | 98.79                                 | 98.92               | 99.33           | 95.07              | 34.35              |
| 14508   | 98.71                                               | 99.12                                 | 98.79                                 | 98.92               | 99.19           | 95.11              | 34.84              |
| 15613   | 98.90                                               | 99.30                                 | 98.80                                 | 98.91               | 99.29           | 95.07              | 34.70              |
| 16490   | 98.82                                               | 99.25                                 | 98.70                                 | 98.84               | 99.25           | 95.01              | 34.07              |
| 16493   | 98.88                                               | 99.32                                 | 98.78                                 | 98.88               | 99.30           | 95.06              | 34.36              |
| 18421   | 98.84                                               | 99.26                                 | 98.73                                 | 98.86               | 99.28           | 95.03              | 33.83              |
| 18422   | 98.91                                               | 99.34                                 | 98.80                                 | 98.94               | 99.32           | 95.10              | 34.60              |
| 18747   | 98.86                                               | 99.28                                 | 98.77                                 | 98.90               | 99.29           | 95.03              | 34.21              |
| 18988   | 98.82                                               | 99.25                                 | 98.75                                 | 98.85               | 99.26           | 95.03              | 34.13              |
| 19057   | 98.90                                               | 99.31                                 | 98.80                                 | 98.92               | 99.31           | 95.06              | 34.18              |
| 19276   | 98.86                                               | 99.28                                 | 98.75                                 | 98.87               | 99.29           | 95.03              | 33.85              |
| 50045   | 98.95                                               | 99.33                                 | 98.79                                 | 98.95               | 99.35           | 95.06              | 34.55              |
| 50179   | 98.88                                               | 99.28                                 | 98.77                                 | 98.90               | 99.30           | 95.05              | 34.27              |
| 50248   | 98.95                                               | 99.39                                 | 98.82                                 | 98.97               | 99.36           | 95.13              | 35.09              |
| 53221   | 99.01                                               | 99.43                                 | 98.87                                 | 99.03               | 99.41           | 95.16              | 35.10              |
| 54902   | 98.97                                               | 99.38                                 | 98.84                                 | 99.00               | 99.37           | 95.13              | 34.83              |
| 55546   | 98.72                                               | 99.13                                 | 98.78                                 | 98.93               | 99.19           | 95.10              | 34.88              |
| 55753   | 98.94                                               | 99.35                                 | 98.83                                 | 98.96               | 99.34           | 95.08              | 34.47              |
| 55988   | 98.98                                               | 99.40                                 | 98.85                                 | 99.00               | 99.38           | 95.14              | 35.22              |
| 55989   | 98.80                                               | 99.22                                 | 98.87                                 | 99.01               | 99.28           | 95.15              | 35.14              |
| 56828   | 99.08                                               | 99.35                                 | 98.69                                 | 98.85               | 99.21           | 95.21              | 35.48              |
| 57052   | 98.86                                               | 99.28                                 | 98.72                                 | 98.86               | 99.29           | 95.01              | 33.95              |
| 58385   | 98.83                                               | 99.27                                 | 98.73                                 | 98.86               | 99.27           | 95.05              | 34.57              |
| 60053   | 98.77                                               | 99.19                                 | 98.85                                 | 98.98               | 99.22           | 95.13              | 35.25              |
| 62796   | 98.92                                               | 99.32                                 | 98.80                                 | 98.92               | 99.33           | 95.07              | 35.01              |
| 62806   | 98.90                                               | 99.31                                 | 98.78                                 | 98.89               | 99.31           | 95.06              | 35.08              |
| 62957   | 98.93                                               | 99.34                                 | 98.78                                 | 98.94               | 99.33           | 95.10              | 35.07              |
| 63113   | 98.97                                               | 99.39                                 | 98.84                                 | 98.98               | 99.38           | 95.12              | 35.13              |
| 63670   | 98.89                                               | 99.32                                 | 98.79                                 | 98.91               | 99.30           | 95.03              | 34.79              |
| 63878   | 98.93                                               | 99.34                                 | 98.81                                 | 98.92               | 99.34           | 95.06              | 34.87              |

|            |       |       |       |       |       |       |       |
|------------|-------|-------|-------|-------|-------|-------|-------|
| 64165      | 98.90 | 99.32 | 98.78 | 98.91 | 99.30 | 95.08 | 34.78 |
| 64334      | 98.73 | 99.14 | 98.78 | 98.93 | 99.18 | 95.08 | 35.15 |
| 64712      | 98.90 | 99.32 | 98.77 | 98.91 | 99.31 | 95.07 | 34.80 |
| 65165      | 98.69 | 99.09 | 98.77 | 98.91 | 99.16 | 95.06 | 34.92 |
| 66591      | 98.50 | 98.89 | 98.57 | 98.70 | 98.95 | 94.89 | 34.50 |
| 68995      | 98.79 | 99.19 | 98.85 | 99.01 | 99.21 | 95.14 | 34.54 |
| 69094      | 99.06 | 99.50 | 98.93 | 99.09 | 99.45 | 95.23 | 35.38 |
| 73787      | 99.08 | 99.52 | 98.93 | 99.09 | 99.48 | 95.19 | 35.28 |
| 74856      | 99.00 | 99.44 | 98.87 | 99.03 | 99.42 | 95.17 | 34.92 |
| 78501      | 99.00 | 99.43 | 98.86 | 98.99 | 99.39 | 95.16 | 34.83 |
| 78932      | 98.98 | 99.42 | 98.84 | 99.04 | 99.40 | 95.18 | 34.93 |
| 79031      | 98.84 | 99.28 | 98.91 | 99.08 | 99.28 | 95.21 | 34.83 |
| MT-0080    | 98.77 | 99.23 | 98.69 | 98.81 | 99.23 | 95.02 | 34.00 |
| MT-0712    | 98.90 | 99.32 | 98.78 | 98.92 | 99.31 | 95.09 | 34.28 |
| MT-0718    | 98.85 | 99.31 | 98.76 | 98.89 | 99.28 | 95.07 | 34.30 |
| MT-0721    | 98.86 | 99.28 | 98.75 | 98.86 | 99.28 | 95.03 | 34.09 |
| MT-0751    | 98.66 | 99.09 | 98.79 | 98.88 | 99.13 | 95.09 | 34.95 |
| MT-0972    | 98.90 | 99.33 | 98.81 | 98.95 | 99.34 | 95.13 | 35.16 |
| MT-1103    | 98.89 | 99.31 | 98.80 | 98.90 | 99.31 | 95.10 | 34.67 |
| MT-1128    | 98.89 | 99.31 | 98.79 | 98.93 | 99.32 | 95.09 | 34.30 |
| MT-1167    | 98.53 | 98.95 | 98.65 | 98.76 | 99.02 | 94.97 | 33.34 |
| MT-1206    | 98.87 | 99.31 | 98.74 | 98.90 | 99.29 | 95.05 | 34.15 |
| MT-1212    | 98.94 | 99.37 | 98.82 | 98.97 | 99.36 | 95.15 | 34.81 |
| MT-1247    | 98.90 | 99.18 | 98.50 | 98.64 | 99.05 | 95.06 | 34.18 |
| MT-13-1408 | 99.03 | 99.31 | 98.68 | 98.81 | 99.16 | 95.19 | 34.80 |
| MT-13-1711 | 99.06 | 99.32 | 98.66 | 98.80 | 99.19 | 95.17 | 34.71 |
| MT-13-1712 | 98.97 | 99.21 | 98.61 | 98.71 | 99.10 | 95.11 | 34.37 |
| MT-13-1753 | 98.73 | 99.17 | 98.82 | 98.98 | 99.21 | 95.12 | 34.80 |
| MT-13-1828 | 99.07 | 99.33 | 98.67 | 98.80 | 99.19 | 95.17 | 34.81 |
| MT-13-1835 | 99.03 | 99.29 | 98.65 | 98.78 | 99.15 | 95.15 | 34.35 |
| MT-13-1892 | 98.99 | 99.26 | 98.59 | 98.74 | 99.13 | 95.11 | 34.62 |
| MT-13-2012 | 98.98 | 99.20 | 98.59 | 98.73 | 99.09 | 95.12 | 35.06 |
| MT-13-2334 | 98.94 | 99.38 | 98.81 | 98.98 | 99.35 | 95.10 | 34.45 |
| MT-13-2384 | 98.72 | 99.15 | 98.80 | 98.94 | 99.19 | 95.09 | 34.63 |
| MT-13-2690 | 99.01 | 99.44 | 98.88 | 99.03 | 99.41 | 95.15 | 34.76 |
| MT-13-2761 | 98.93 | 99.38 | 98.80 | 98.95 | 99.35 | 95.07 | 34.13 |
| MT-13-3209 | 98.74 | 99.17 | 98.84 | 98.98 | 99.21 | 95.12 | 34.68 |
| MT-13-848  | 98.96 | 99.24 | 98.61 | 98.71 | 99.11 | 95.16 | 34.86 |
| MT-131     | 98.56 | 98.96 | 98.66 | 98.78 | 99.04 | 94.96 | 33.19 |
| MT-1336    | 98.81 | 99.24 | 98.72 | 98.83 | 99.26 | 95.03 | 33.84 |
| MT-1345    | 98.67 | 99.12 | 98.75 | 98.88 | 99.17 | 95.03 | 34.17 |
| MT-1393    | 98.87 | 99.30 | 98.78 | 98.88 | 99.29 | 95.05 | 34.25 |

|         |       |       |       |       |       |       |       |
|---------|-------|-------|-------|-------|-------|-------|-------|
| MT-140  | 98.86 | 99.28 | 98.73 | 98.87 | 99.28 | 95.05 | 33.98 |
| MT-1403 | 98.80 | 99.23 | 98.69 | 98.82 | 99.24 | 95.02 | 34.30 |
| MT-1466 | 98.88 | 99.34 | 98.77 | 98.94 | 99.32 | 95.09 | 34.47 |
| MT-1499 | 98.80 | 99.23 | 98.68 | 98.83 | 99.23 | 95.04 | 34.43 |
| MT-1549 | 98.89 | 99.32 | 98.77 | 98.90 | 99.32 | 95.10 | 34.36 |
| MT-1605 | 98.84 | 99.29 | 98.75 | 98.90 | 99.31 | 95.08 | 34.38 |
| MT-1684 | 98.88 | 99.30 | 98.77 | 98.90 | 99.31 | 95.12 | 35.29 |
| MT-1799 | 98.87 | 99.29 | 98.75 | 98.88 | 99.28 | 95.08 | 34.71 |
| MT-1838 | 98.89 | 99.31 | 98.78 | 98.92 | 99.31 | 95.11 | 34.87 |
| MT-1971 | 98.89 | 99.32 | 98.76 | 98.91 | 99.32 | 95.05 | 34.36 |
| MT-2151 | 98.86 | 99.28 | 98.76 | 98.88 | 99.29 | 95.07 | 34.42 |
| MT-2174 | 98.83 | 99.25 | 98.73 | 98.87 | 99.27 | 95.02 | 33.81 |
| MT-2175 | 98.80 | 99.20 | 98.70 | 98.83 | 99.24 | 95.03 | 33.89 |
| MT-2178 | 98.67 | 99.08 | 98.75 | 98.86 | 99.12 | 95.05 | 34.27 |
| MT-2184 | 98.86 | 99.29 | 98.77 | 98.89 | 99.30 | 95.08 | 34.41 |
| MT-2224 | 98.79 | 99.23 | 98.68 | 98.80 | 99.24 | 95.00 | 34.03 |
| MT-2356 | 98.91 | 99.32 | 98.80 | 98.90 | 99.32 | 95.10 | 34.67 |
| MT-2465 | 98.90 | 99.33 | 98.81 | 98.93 | 99.33 | 95.11 | 34.64 |
| MT-2473 | 98.82 | 99.26 | 98.76 | 98.87 | 99.26 | 95.09 | 34.67 |
| MT-2474 | 98.76 | 99.19 | 98.69 | 98.79 | 99.22 | 94.98 | 33.57 |
| MT-2538 | 98.89 | 99.30 | 98.77 | 98.89 | 99.30 | 95.08 | 34.64 |
| MT-2665 | 98.82 | 99.21 | 98.71 | 98.83 | 99.23 | 95.02 | 33.78 |
| MT-2667 | 98.84 | 99.27 | 98.73 | 98.85 | 99.28 | 95.08 | 34.42 |
| MT-2706 | 98.85 | 99.28 | 98.74 | 98.87 | 99.28 | 95.03 | 34.00 |
| MT-2720 | 98.85 | 99.31 | 98.77 | 98.90 | 99.30 | 95.10 | 34.70 |
| MT-2762 | 98.83 | 99.26 | 98.74 | 98.85 | 99.26 | 95.04 | 34.40 |
| MT-2768 | 98.91 | 99.32 | 98.77 | 98.92 | 99.32 | 95.09 | 34.21 |
| MT-2769 | 98.86 | 99.28 | 98.77 | 98.87 | 99.28 | 95.07 | 34.54 |
| MT-2771 | 98.82 | 99.24 | 98.73 | 98.85 | 99.28 | 95.08 | 34.61 |
| MT-2792 | 98.57 | 98.96 | 98.64 | 98.76 | 99.02 | 94.94 | 34.33 |
| MT-2800 | 98.90 | 99.33 | 98.81 | 98.94 | 99.32 | 95.12 | 34.64 |
| MT-289  | 98.93 | 99.38 | 98.83 | 98.97 | 99.38 | 95.13 | 34.69 |
| MT-2905 | 98.48 | 98.89 | 98.59 | 98.69 | 98.96 | 94.87 | 34.02 |
| MT-2910 | 98.55 | 98.96 | 98.64 | 98.77 | 99.01 | 94.93 | 34.53 |
| MT-2931 | 98.61 | 99.04 | 98.67 | 98.81 | 99.08 | 95.00 | 35.18 |
| MT-3000 | 98.64 | 99.04 | 98.65 | 98.80 | 99.09 | 94.94 | 34.28 |
| MT-3004 | 98.53 | 98.94 | 98.62 | 98.75 | 98.99 | 94.96 | 34.72 |
| MT-3074 | 98.79 | 99.22 | 98.70 | 98.80 | 99.22 | 95.01 | 33.66 |
| MT-3173 | 98.66 | 99.08 | 98.56 | 98.65 | 99.08 | 94.90 | 33.11 |
| MT-3194 | 98.84 | 99.27 | 98.74 | 98.88 | 99.26 | 95.11 | 34.61 |
| MT-3239 | 98.61 | 99.02 | 98.67 | 98.80 | 99.10 | 95.02 | 34.17 |
| MT-3255 | 98.71 | 99.13 | 98.62 | 98.73 | 99.15 | 94.95 | 33.11 |

|         |       |       |       |       |       |       |       |
|---------|-------|-------|-------|-------|-------|-------|-------|
| MT-3271 | 98.79 | 99.22 | 98.72 | 98.80 | 99.22 | 94.97 | 33.48 |
| MT-3281 | 98.62 | 99.04 | 98.72 | 98.85 | 99.11 | 95.05 | 34.42 |
| MT-3296 | 98.77 | 99.17 | 98.82 | 98.97 | 99.21 | 95.10 | 34.71 |
| MT-3341 | 98.76 | 99.22 | 98.67 | 98.79 | 99.21 | 95.00 | 33.72 |
| MT-3673 | 98.89 | 99.30 | 98.76 | 98.90 | 99.31 | 95.07 | 34.12 |
| MT-3683 | 98.81 | 99.25 | 98.72 | 98.85 | 99.24 | 95.06 | 34.34 |
| MT-3787 | 98.82 | 99.25 | 98.72 | 98.84 | 99.25 | 95.04 | 33.92 |
| MT-389  | 98.82 | 99.26 | 98.72 | 98.87 | 99.26 | 95.06 | 34.04 |
| MT-393  | 98.68 | 99.09 | 98.75 | 98.87 | 99.15 | 95.07 | 34.66 |
| MT-398  | 98.78 | 99.18 | 98.64 | 98.75 | 99.20 | 94.97 | 33.36 |
| MT-405  | 98.84 | 99.27 | 98.75 | 98.86 | 99.27 | 95.07 | 34.22 |
| MT-4067 | 98.81 | 99.24 | 98.72 | 98.84 | 99.26 | 95.03 | 34.12 |
| MT-4137 | 98.68 | 99.11 | 98.77 | 98.91 | 99.16 | 95.07 | 34.44 |
| MT-4166 | 98.99 | 99.41 | 98.87 | 99.00 | 99.41 | 95.16 | 35.33 |
| MT-4230 | 98.79 | 99.20 | 98.85 | 99.00 | 99.24 | 95.14 | 35.10 |
| MT-441  | 98.95 | 99.36 | 98.80 | 98.95 | 99.37 | 95.09 | 34.49 |
| MT-452  | 98.94 | 99.40 | 98.84 | 98.98 | 99.39 | 95.14 | 34.63 |
| MT-467  | 98.80 | 99.21 | 98.69 | 98.83 | 99.23 | 94.99 | 33.61 |
| MT-4683 | 98.88 | 99.30 | 98.75 | 98.89 | 99.29 | 95.07 | 34.42 |
| MT-4846 | 98.47 | 98.88 | 98.58 | 98.67 | 98.97 | 94.93 | 32.92 |
| MT-4854 | 98.82 | 99.25 | 98.72 | 98.86 | 99.25 | 95.06 | 33.95 |
| MT-4884 | 98.63 | 99.07 | 98.72 | 98.85 | 99.12 | 95.05 | 34.33 |
| MT-4942 | 98.77 | 99.20 | 98.68 | 98.79 | 99.22 | 95.00 | 33.83 |
| MT-504  | 98.98 | 99.44 | 98.87 | 99.00 | 99.41 | 95.15 | 34.94 |
| MT-5195 | 98.95 | 99.38 | 98.83 | 98.98 | 99.38 | 95.12 | 34.82 |
| MT-5337 | 98.71 | 99.14 | 98.64 | 98.73 | 99.15 | 94.97 | 33.36 |
| MT-5373 | 98.93 | 99.34 | 98.80 | 98.92 | 99.33 | 95.13 | 35.07 |
| MT-5383 | 98.85 | 99.28 | 98.76 | 98.88 | 99.28 | 95.05 | 34.52 |
| MT-5447 | 98.71 | 99.09 | 98.77 | 98.93 | 99.16 | 95.09 | 34.95 |
| MT-5531 | 98.70 | 99.13 | 98.64 | 98.73 | 99.17 | 94.95 | 33.32 |
| MT-5543 | 98.65 | 99.08 | 98.74 | 98.87 | 99.15 | 95.05 | 34.39 |
| MT-567  | 98.82 | 99.23 | 98.73 | 98.84 | 99.25 | 95.06 | 34.39 |
| MT-5870 | 98.85 | 99.27 | 98.72 | 98.85 | 99.27 | 95.05 | 34.16 |
| MT-5983 | 98.84 | 99.26 | 98.77 | 98.84 | 99.26 | 95.11 | 34.65 |
| MT-6084 | 98.82 | 99.25 | 98.73 | 98.84 | 99.24 | 95.07 | 34.25 |
| MT-6205 | 98.62 | 99.06 | 98.72 | 98.86 | 99.12 | 95.05 | 34.61 |
| MT-6218 | 98.90 | 99.34 | 98.81 | 98.93 | 99.35 | 95.11 | 34.91 |
| MT-6226 | 98.73 | 99.17 | 98.65 | 98.73 | 99.18 | 94.96 | 33.35 |
| MT-6429 | 98.90 | 99.33 | 98.80 | 98.94 | 99.35 | 95.13 | 35.16 |
| MT-661  | 98.90 | 99.33 | 98.78 | 98.90 | 99.31 | 95.07 | 34.33 |
| MT-692  | 98.92 | 99.34 | 98.90 | 98.97 | 99.36 | 95.16 | 38.20 |
| MT-853  | 98.83 | 99.24 | 98.71 | 98.83 | 99.24 | 95.01 | 34.34 |

MT-877

98.92

99.36

98.78

98.92

99.34

95.08

34.43
