# Supplementary material
Source: PubMed Central journal article supplement (PMC4922084)
Supplement: JCM.00364-16_zjm999095013so4.pdf [file JCM.00364-16_zjm999095013so4.pdf]

**TABLE S3** Depth of coverage for each isolate

| Isolate | Average depth of coverage by reference genome |                                       |                                       |                     |                 |                    |                    |
|---------|-----------------------------------------------|---------------------------------------|---------------------------------------|---------------------|-----------------|--------------------|--------------------|
|         | <i>M. tuberculosis</i> ,<br>lineage 4         | <i>M. tuberculosis</i> ,<br>lineage 4 | <i>M. tuberculosis</i> ,<br>lineage 2 | <i>M. africanum</i> | <i>M. bovis</i> | <i>M. canettii</i> | <i>M. kansasii</i> |
|         | H37Rv                                         | CDC1551                               | CCDC5079                              | GN041182            | AF2122/97       | CIPT<br>140010059  | ATCC<br>12478      |
| 9965    | 68.99                                         | 69.26                                 | 68.98                                 | 68.90               | 69.60           | 66.41              | 15.03              |
| 10155   | 47.63                                         | 47.81                                 | 47.61                                 | 47.55               | 48.06           | 45.82              | 10.91              |
| 10223   | 79.56                                         | 79.88                                 | 79.70                                 | 79.62               | 80.27           | 76.70              | 17.65              |
| 11011   | 49.04                                         | 49.22                                 | 49.03                                 | 48.95               | 49.45           | 47.18              | 11.26              |
| 11234   | 42.84                                         | 43.00                                 | 42.83                                 | 42.76               | 43.20           | 41.22              | 9.63               |
| 14069   | 51.64                                         | 51.82                                 | 51.62                                 | 51.54               | 52.08           | 49.67              | 11.75              |
| 14508   | 79.36                                         | 79.69                                 | 79.53                                 | 79.45               | 80.03           | 76.58              | 17.60              |
| 15613   | 73.42                                         | 73.73                                 | 73.40                                 | 73.34               | 74.11           | 70.63              | 15.77              |
| 16490   | 57.99                                         | 58.23                                 | 57.98                                 | 57.92               | 58.48           | 55.78              | 12.65              |
| 16493   | 58.34                                         | 58.56                                 | 58.33                                 | 58.22               | 58.84           | 56.15              | 13.12              |
| 18421   | 43.40                                         | 43.58                                 | 43.39                                 | 43.34               | 43.79           | 41.76              | 9.84               |
| 18422   | 65.68                                         | 65.92                                 | 65.68                                 | 65.59               | 66.27           | 63.20              | 14.72              |
| 18747   | 51.66                                         | 51.87                                 | 51.65                                 | 51.59               | 52.19           | 49.70              | 11.76              |
| 18988   | 49.43                                         | 49.63                                 | 49.42                                 | 49.35               | 49.95           | 47.53              | 11.18              |
| 19057   | 49.32                                         | 49.50                                 | 49.31                                 | 49.25               | 49.81           | 47.47              | 11.27              |
| 19276   | 40.47                                         | 40.63                                 | 40.45                                 | 40.41               | 40.90           | 38.92              | 9.22               |
| 50045   | 55.85                                         | 56.07                                 | 55.83                                 | 55.79               | 56.34           | 53.70              | 12.16              |
| 50179   | 53.03                                         | 53.24                                 | 53.03                                 | 52.96               | 53.56           | 51.05              | 12.22              |
| 50248   | 80.81                                         | 81.13                                 | 80.80                                 | 80.72               | 81.54           | 77.75              | 17.40              |
| 53221   | 75.43                                         | 75.72                                 | 75.39                                 | 75.35               | 76.07           | 72.58              | 17.16              |
| 54902   | 59.53                                         | 59.77                                 | 59.51                                 | 59.45               | 60.06           | 57.26              | 13.31              |
| 55546   | 89.11                                         | 89.47                                 | 89.25                                 | 89.21               | 89.90           | 85.92              | 19.69              |
| 55753   | 52.70                                         | 52.90                                 | 52.71                                 | 52.64               | 53.14           | 50.71              | 11.77              |
| 55988   | 98.92                                         | 99.31                                 | 98.89                                 | 98.82               | 99.75           | 95.26              | 22.72              |
| 55989   | 89.10                                         | 89.44                                 | 89.21                                 | 89.18               | 89.86           | 85.93              | 20.67              |
| 56828   | 111.65                                        | 111.89                                | 111.37                                | 111.23              | 112.33          | 107.49             | 25.85              |
| 57052   | 40.81                                         | 40.98                                 | 40.80                                 | 40.76               | 41.21           | 39.26              | 9.31               |
| 58385   | 74.28                                         | 74.57                                 | 74.25                                 | 74.19               | 74.94           | 71.46              | 15.76              |
| 60053   | 84.05                                         | 84.37                                 | 84.16                                 | 84.14               | 84.76           | 81.10              | 19.00              |
| 62796   | 77.14                                         | 77.43                                 | 77.11                                 | 77.06               | 77.79           | 74.27              | 17.23              |
| 62806   | 88.45                                         | 88.77                                 | 88.39                                 | 88.35               | 89.21           | 85.14              | 20.01              |
| 62957   | 74.01                                         | 74.30                                 | 73.99                                 | 73.97               | 74.67           | 71.25              | 16.20              |
| 63113   | 79.20                                         | 79.51                                 | 79.18                                 | 79.14               | 79.92           | 76.24              | 17.98              |
| 63670   | 68.14                                         | 68.41                                 | 68.12                                 | 68.07               | 68.79           | 65.62              | 15.57              |
| 63878   | 73.12                                         | 73.40                                 | 73.10                                 | 73.05               | 73.75           | 70.41              | 16.69              |

|            |        |        |        |        |        |        |       |
|------------|--------|--------|--------|--------|--------|--------|-------|
| 64165      | 65.98  | 66.23  | 65.95  | 65.92  | 66.59  | 63.53  | 14.78 |
| 64334      | 83.68  | 84.01  | 83.78  | 83.80  | 84.41  | 80.70  | 18.81 |
| 64712      | 70.07  | 70.33  | 70.04  | 70.00  | 70.66  | 67.48  | 15.68 |
| 65165      | 75.17  | 75.47  | 75.26  | 75.27  | 75.82  | 72.57  | 17.04 |
| 66591      | 58.02  | 58.25  | 58.10  | 58.09  | 58.51  | 56.01  | 13.18 |
| 68995      | 54.47  | 54.69  | 54.56  | 54.54  | 54.86  | 52.49  | 12.26 |
| 69094      | 89.53  | 89.86  | 89.52  | 89.42  | 90.22  | 86.12  | 19.87 |
| 73787      | 71.92  | 72.18  | 71.88  | 71.83  | 72.48  | 69.16  | 16.54 |
| 74856      | 73.43  | 73.73  | 73.42  | 73.35  | 74.03  | 70.61  | 15.85 |
| 78501      | 61.82  | 62.03  | 61.80  | 61.75  | 62.32  | 59.46  | 13.70 |
| 78932      | 68.42  | 68.68  | 68.40  | 68.35  | 68.97  | 65.82  | 15.11 |
| 79031      | 62.64  | 62.86  | 62.70  | 62.70  | 63.17  | 60.40  | 14.48 |
| MT-0080    | 58.44  | 58.65  | 58.45  | 58.36  | 58.93  | 56.25  | 12.85 |
| MT-0712    | 53.75  | 53.95  | 53.74  | 53.68  | 54.21  | 51.73  | 11.95 |
| MT-0718    | 54.04  | 54.24  | 54.04  | 53.97  | 54.54  | 52.03  | 11.81 |
| MT-0721    | 48.33  | 48.50  | 48.34  | 48.26  | 48.77  | 46.55  | 10.53 |
| MT-0751    | 48.42  | 48.59  | 48.50  | 48.45  | 48.84  | 46.70  | 10.74 |
| MT-0972    | 88.00  | 88.33  | 87.98  | 87.88  | 88.75  | 84.72  | 20.13 |
| MT-1103    | 70.91  | 71.17  | 70.89  | 70.79  | 71.50  | 68.24  | 15.79 |
| MT-1128    | 48.84  | 49.01  | 48.83  | 48.75  | 49.27  | 47.03  | 11.14 |
| MT-1167    | 43.48  | 43.64  | 43.55  | 43.50  | 43.89  | 41.85  | 8.69  |
| MT-1206    | 51.48  | 51.65  | 51.47  | 51.40  | 51.92  | 49.52  | 11.14 |
| MT-1212    | 73.74  | 74.01  | 73.72  | 73.64  | 74.38  | 70.96  | 16.05 |
| MT-1247    | 58.07  | 58.19  | 57.94  | 57.88  | 58.43  | 55.93  | 13.00 |
| MT-13-1408 | 78.78  | 78.94  | 78.59  | 78.50  | 79.25  | 75.85  | 17.81 |
| MT-13-1711 | 60.34  | 60.45  | 60.19  | 60.10  | 60.70  | 58.10  | 13.73 |
| MT-13-1712 | 60.17  | 60.29  | 60.06  | 59.95  | 60.54  | 57.93  | 13.00 |
| MT-13-1753 | 70.94  | 71.21  | 71.04  | 70.97  | 71.51  | 68.38  | 15.95 |
| MT-13-1828 | 69.56  | 69.70  | 69.39  | 69.30  | 70.01  | 66.97  | 15.58 |
| MT-13-1835 | 48.67  | 48.78  | 48.56  | 48.51  | 48.97  | 46.89  | 11.00 |
| MT-13-1892 | 61.89  | 62.01  | 61.73  | 61.64  | 62.25  | 59.59  | 13.98 |
| MT-13-2012 | 108.73 | 108.98 | 108.46 | 108.33 | 109.37 | 104.68 | 23.30 |
| MT-13-2334 | 56.86  | 57.07  | 56.85  | 56.79  | 57.37  | 54.71  | 12.44 |
| MT-13-2384 | 63.19  | 63.42  | 63.28  | 63.22  | 63.72  | 60.92  | 14.13 |
| MT-13-2690 | 66.11  | 66.35  | 66.10  | 66.03  | 66.68  | 63.62  | 14.63 |
| MT-13-2761 | 49.01  | 49.19  | 49.01  | 48.95  | 49.45  | 47.18  | 10.79 |
| MT-13-3209 | 68.42  | 68.66  | 68.51  | 68.44  | 69.00  | 65.96  | 15.26 |
| MT-13-848  | 92.69  | 92.91  | 92.46  | 92.38  | 93.27  | 89.27  | 20.29 |
| MT-131     | 39.42  | 39.57  | 39.48  | 39.41  | 39.82  | 37.97  | 8.11  |
| MT-1336    | 46.87  | 47.02  | 46.88  | 46.76  | 47.29  | 45.09  | 10.23 |
| MT-1345    | 48.42  | 48.58  | 48.49  | 48.42  | 48.84  | 46.72  | 11.06 |
| MT-1393    | 52.67  | 52.84  | 52.65  | 52.55  | 53.12  | 50.69  | 11.88 |

|         |        |        |        |        |        |        |       |
|---------|--------|--------|--------|--------|--------|--------|-------|
| MT-140  | 42.75  | 42.89  | 42.75  | 42.66  | 43.12  | 41.15  | 9.77  |
| MT-1403 | 74.69  | 74.97  | 74.69  | 74.59  | 75.32  | 71.89  | 16.09 |
| MT-1466 | 53.41  | 53.60  | 53.41  | 53.33  | 53.90  | 51.41  | 11.66 |
| MT-1499 | 71.15  | 71.41  | 71.17  | 71.04  | 71.75  | 68.48  | 15.53 |
| MT-1549 | 53.16  | 53.35  | 53.17  | 53.06  | 53.62  | 51.13  | 11.95 |
| MT-1605 | 55.26  | 55.47  | 55.24  | 55.18  | 55.75  | 53.17  | 12.48 |
| MT-1684 | 123.56 | 123.99 | 123.54 | 123.34 | 124.59 | 118.86 | 27.31 |
| MT-1799 | 80.97  | 81.26  | 80.95  | 80.86  | 81.66  | 77.94  | 18.15 |
| MT-1838 | 81.86  | 82.16  | 81.87  | 81.72  | 82.56  | 78.82  | 18.60 |
| MT-1971 | 49.45  | 49.60  | 49.45  | 49.33  | 49.86  | 47.59  | 11.30 |
| MT-2151 | 62.35  | 62.59  | 62.36  | 62.28  | 62.91  | 60.03  | 14.07 |
| MT-2174 | 38.15  | 38.27  | 38.14  | 38.06  | 38.47  | 36.69  | 8.26  |
| MT-2175 | 43.85  | 43.98  | 43.84  | 43.75  | 44.22  | 42.16  | 9.63  |
| MT-2178 | 50.66  | 50.81  | 50.74  | 50.65  | 51.12  | 48.83  | 11.32 |
| MT-2184 | 56.40  | 56.58  | 56.39  | 56.25  | 56.88  | 54.26  | 12.58 |
| MT-2224 | 51.33  | 51.49  | 51.32  | 51.20  | 51.79  | 49.36  | 10.92 |
| MT-2356 | 62.91  | 63.10  | 62.91  | 62.78  | 63.46  | 60.54  | 14.20 |
| MT-2465 | 62.19  | 62.41  | 62.18  | 62.06  | 62.73  | 59.84  | 14.19 |
| MT-2473 | 80.14  | 80.43  | 80.13  | 80.03  | 80.84  | 77.13  | 17.72 |
| MT-2474 | 49.12  | 49.30  | 49.11  | 49.04  | 49.59  | 47.27  | 10.27 |
| MT-2538 | 60.33  | 60.52  | 60.32  | 60.19  | 60.87  | 58.04  | 13.60 |
| MT-2665 | 47.72  | 47.89  | 47.71  | 47.64  | 48.13  | 45.92  | 10.54 |
| MT-2667 | 61.75  | 61.98  | 61.76  | 61.68  | 62.33  | 59.48  | 13.64 |
| MT-2706 | 42.99  | 43.13  | 43.00  | 42.90  | 43.36  | 41.35  | 9.53  |
| MT-2720 | 67.83  | 68.05  | 67.81  | 67.69  | 68.40  | 65.29  | 15.47 |
| MT-2762 | 56.61  | 56.81  | 56.61  | 56.51  | 57.10  | 54.52  | 12.81 |
| MT-2768 | 46.93  | 47.08  | 46.92  | 46.84  | 47.35  | 45.19  | 10.51 |
| MT-2769 | 63.40  | 63.60  | 63.40  | 63.28  | 63.95  | 61.05  | 14.32 |
| MT-2771 | 80.10  | 80.38  | 80.10  | 79.98  | 80.80  | 77.08  | 17.65 |
| MT-2792 | 60.65  | 60.86  | 60.75  | 60.65  | 61.17  | 58.52  | 13.46 |
| MT-2800 | 64.85  | 65.08  | 64.85  | 64.74  | 65.37  | 62.44  | 14.83 |
| MT-289  | 68.07  | 68.34  | 68.07  | 67.98  | 68.64  | 65.52  | 15.43 |
| MT-2905 | 56.03  | 56.25  | 56.12  | 56.08  | 56.49  | 54.05  | 12.51 |
| MT-2910 | 69.75  | 70.00  | 69.87  | 69.81  | 70.38  | 67.36  | 15.90 |
| MT-2931 | 104.96 | 105.40 | 105.16 | 105.09 | 105.93 | 101.32 | 23.75 |
| MT-3000 | 53.55  | 53.73  | 53.64  | 53.56  | 54.01  | 51.64  | 11.88 |
| MT-3004 | 75.17  | 75.41  | 75.30  | 75.17  | 75.78  | 72.50  | 16.71 |
| MT-3074 | 49.85  | 50.00  | 49.85  | 49.74  | 50.29  | 47.97  | 10.39 |
| MT-3173 | 42.06  | 42.23  | 42.05  | 42.04  | 42.45  | 40.47  | 8.63  |
| MT-3194 | 72.91  | 73.18  | 72.92  | 72.82  | 73.55  | 70.16  | 15.96 |
| MT-3239 | 71.75  | 72.00  | 71.87  | 71.78  | 72.36  | 69.21  | 15.68 |
| MT-3255 | 44.38  | 44.54  | 44.38  | 44.31  | 44.76  | 42.71  | 9.55  |

|         |       |       |       |       |       |       |       |
|---------|-------|-------|-------|-------|-------|-------|-------|
| MT-3271 | 47.46 | 47.63 | 47.47 | 47.39 | 47.86 | 45.61 | 10.20 |
| MT-3281 | 80.10 | 80.38 | 80.24 | 80.12 | 80.78 | 77.25 | 17.26 |
| MT-3296 | 61.10 | 61.29 | 61.19 | 61.09 | 61.64 | 58.91 | 13.89 |
| MT-3341 | 46.84 | 47.01 | 46.84 | 46.75 | 47.26 | 45.07 | 10.18 |
| MT-3673 | 48.90 | 49.05 | 48.89 | 48.80 | 49.33 | 47.03 | 10.74 |
| MT-3683 | 70.56 | 70.82 | 70.56 | 70.45 | 71.17 | 67.93 | 15.47 |
| MT-3787 | 45.52 | 45.68 | 45.51 | 45.43 | 45.92 | 43.80 | 10.15 |
| MT-389  | 48.13 | 39.43 | 48.13 | 48.02 | 48.53 | 46.30 | 10.67 |
| MT-393  | 67.52 | 67.74 | 67.62 | 67.54 | 68.10 | 65.15 | 15.46 |
| MT-398  | 39.29 | 39.43 | 39.28 | 39.23 | 39.62 | 37.83 | 8.67  |
| MT-405  | 53.99 | 54.17 | 53.99 | 53.87 | 54.46 | 51.95 | 11.96 |
| MT-4067 | 59.17 | 59.37 | 59.16 | 59.07 | 59.65 | 56.93 | 13.02 |
| MT-4137 | 53.08 | 53.24 | 53.17 | 53.09 | 53.55 | 51.20 | 11.95 |
| MT-4166 | 96.86 | 97.22 | 96.82 | 96.73 | 97.70 | 93.22 | 21.74 |
| MT-4230 | 91.26 | 91.62 | 91.40 | 91.35 | 92.04 | 88.05 | 20.36 |
| MT-441  | 54.34 | 54.51 | 54.33 | 54.21 | 54.80 | 52.31 | 12.39 |
| MT-452  | 55.69 | 55.89 | 55.70 | 55.59 | 56.21 | 53.61 | 12.36 |
| MT-467  | 47.90 | 48.10 | 47.93 | 47.87 | 48.35 | 46.11 | 10.31 |
| MT-4683 | 67.69 | 67.91 | 67.69 | 67.58 | 68.28 | 65.13 | 14.95 |
| MT-4846 | 53.03 | 53.26 | 53.13 | 53.10 | 53.61 | 51.08 | 10.29 |
| MT-4854 | 53.10 | 53.28 | 53.10 | 53.00 | 53.54 | 51.09 | 11.75 |
| MT-4884 | 65.72 | 65.95 | 65.80 | 65.75 | 66.25 | 63.37 | 14.69 |
| MT-4942 | 60.97 | 61.19 | 60.98 | 60.87 | 61.50 | 58.68 | 13.13 |
| MT-504  | 67.54 | 67.77 | 67.53 | 67.42 | 68.10 | 64.99 | 15.88 |
| MT-5195 | 76.29 | 76.57 | 76.29 | 76.17 | 76.94 | 73.44 | 17.60 |
| MT-5337 | 50.84 | 51.03 | 50.85 | 50.77 | 51.32 | 48.94 | 10.64 |
| MT-5373 | 96.44 | 96.80 | 96.42 | 96.29 | 97.25 | 92.83 | 21.46 |
| MT-5383 | 61.66 | 61.90 | 61.67 | 61.61 | 62.23 | 59.31 | 12.84 |
| MT-5447 | 55.46 | 55.69 | 55.56 | 55.52 | 56.05 | 53.44 | 11.78 |
| MT-5531 | 56.13 | 56.39 | 56.15 | 56.10 | 56.73 | 54.00 | 11.29 |
| MT-5543 | 58.77 | 58.96 | 58.86 | 58.78 | 59.28 | 56.70 | 12.82 |
| MT-567  | 77.89 | 78.17 | 77.89 | 77.76 | 78.54 | 74.96 | 16.78 |
| MT-5870 | 50.87 | 51.04 | 50.86 | 50.77 | 51.31 | 48.96 | 11.11 |
| MT-5983 | 76.06 | 76.39 | 76.07 | 76.00 | 76.91 | 73.13 | 15.39 |
| MT-6084 | 69.98 | 70.23 | 69.98 | 69.86 | 70.58 | 67.36 | 15.11 |
| MT-6205 | 73.78 | 74.10 | 73.89 | 73.87 | 74.54 | 71.13 | 15.46 |
| MT-6218 | 74.27 | 74.56 | 74.27 | 74.17 | 74.91 | 71.50 | 17.00 |
| MT-6226 | 52.55 | 52.81 | 52.57 | 52.54 | 53.15 | 50.52 | 10.43 |
| MT-6429 | 88.53 | 88.87 | 88.52 | 88.39 | 89.33 | 85.24 | 20.10 |
| MT-661  | 49.89 | 50.05 | 49.88 | 49.79 | 50.32 | 47.99 | 11.08 |
| MT-692  | 66.84 | 67.09 | 66.84 | 66.74 | 67.43 | 64.32 | 14.61 |
| MT-853  | 59.55 | 59.75 | 59.56 | 59.45 | 60.08 | 57.31 | 13.03 |

MT-877

51.41

51.57

51.41

51.31

51.86

49.49

11.43
