# Supplementary material
Source: PubMed Central journal article supplement (PMC4922084)
Supplement: JCM.00364-16_zjm999095013so5.pdf [file JCM.00364-16_zjm999095013so5.pdf]

**TABLE S4** Clusters and colour scheme used in Figures

| Isolate    | Cluster according to <i>M. tuberculosis</i> lineage 4, CDC1551 | Colours used in all figures based on the CDC1551 clusters | Changes in clustering compared to those identified using CDC1551, by reference genome |                                 |                     |                 |                    |                    |
|------------|----------------------------------------------------------------|-----------------------------------------------------------|---------------------------------------------------------------------------------------|---------------------------------|---------------------|-----------------|--------------------|--------------------|
|            |                                                                |                                                           | <i>M. tuberculosis</i> H37Rv                                                          | <i>M. tuberculosis</i> CCDC5079 | <i>M. africanum</i> | <i>M. bovis</i> | <i>M. canettii</i> | <i>M. kansasii</i> |
| 56828      | Mn                                                             | Blue                                                      | No change                                                                             | No change                       | No change           | No change       | No change          | Clustering lost    |
| MT-1247    | Mn                                                             |                                                           | No change                                                                             | No change                       | No change           | No change       | No change          | Clustering lost    |
| MT-13-1408 | Mn                                                             |                                                           | No change                                                                             | No change                       | No change           | No change       | No change          | Clustering lost    |
| MT-13-1711 | Mn                                                             |                                                           | No change                                                                             | No change                       | No change           | No change       | No change          | Clustering lost    |
| MT-13-1712 | Mn                                                             |                                                           | No change                                                                             | No change                       | No change           | No change       | No change          | Clustering lost    |
| MT-13-1828 | Mn                                                             |                                                           | No change                                                                             | No change                       | No change           | No change       | No change          | Clustering lost    |
| MT-13-1835 | Mn                                                             |                                                           | No change                                                                             | No change                       | No change           | No change       | No change          | Clustering lost    |
| MT-13-1892 | Mn                                                             |                                                           | No change                                                                             | No change                       | No change           | No change       | No change          | Clustering lost    |
| MT-13-2012 | Mn                                                             |                                                           | No change                                                                             | No change                       | No change           | No change       | No change          | Clustering lost    |
| MT-13-848  | Mn                                                             |                                                           | No change                                                                             | No change                       | No change           | No change       | No change          | Clustering lost    |
| 55753      | Mj-VI                                                          | Grey                                                      | No change                                                                             | No change                       | No change           | No change       | No change          | No change          |
| 55988      | Mj-VI                                                          | Grey                                                      | No change                                                                             | No change                       | No change           | No change       | No change          | No change          |
| 10155      | Mj-I                                                           | Purple                                                    | No change                                                                             | No change                       | No change           | No change       | No change          | No change          |
| 11011      | Mj-I                                                           |                                                           | No change                                                                             | No change                       | No change           | No change       | No change          | No change          |
| 11234      | Mj-I                                                           |                                                           | No change                                                                             | No change                       | No change           | No change       | No change          | No change          |
| 14069      | Mj-I                                                           |                                                           | No change                                                                             | No change                       | No change           | No change       | No change          | No change          |
| 16493      | Mj-I                                                           |                                                           | No change                                                                             | No change                       | No change           | No change       | No change          | No change          |
| 18421      | Mj-I                                                           |                                                           | No change                                                                             | No change                       | No change           | No change       | No change          | No change          |
| 18422      | Mj-I                                                           |                                                           | No change                                                                             | No change                       | No change           | No change       | No change          | No change          |
| 18747      | Mj-II                                                          |                                                           | No change                                                                             | No change                       | No change           | No change       | No change          | Clustering lost    |
| 18988      | Mj-II                                                          | Teal                                                      | No change                                                                             | No change                       | No change           | No change       | No change          | Clustering lost    |
| 19057      | Mj-II                                                          |                                                           | No change                                                                             | No change                       | No change           | No change       | No change          | Clustering lost    |

|            |         |  |           |           |           |           |           |                 |
|------------|---------|--|-----------|-----------|-----------|-----------|-----------|-----------------|
| 19276      | Mj-II   |  | No change | Clustering lost |
| 50179      | Mj-II   |  | No change | Clustering lost |
| 57052      | Mj-II   |  | No change | Clustering lost |
| 63670      | Mj-II   |  | No change | Clustering lost |
| 64165      | Mj-II   |  | No change | Clustering lost |
| 54902      | Mj-IV.a |  | No change | Clustering lost |
| 9965       | Mj-IV.a |  | No change | Clustering lost |
| 16490      | Mj-IV.b |  | No change | Clustering lost |
| 50045      | Mj-IV.b |  | No change | Clustering lost |
| 50248      | Mj-IV.b |  | No change | Clustering lost |
| 53221      | Mj-IV.b |  | No change | Clustering lost |
| 62806      | Mj-IV.b |  | No change | Clustering lost |
| 62957      | Mj-IV.b |  | No change | Clustering lost |
| 63113      | Mj-IV.b |  | No change | Clustering lost |
| 64712      | Mj-IV.b |  | No change | Clustering lost |
| MT-13-2334 | Mj-IV.b |  | No change | Clustering lost |
| MT-13-2690 | Mj-IV.b |  | No change | Clustering lost |
| MT-13-2761 | Mj-IV.b |  | No change | Clustering lost |
| MT-1403    | Mj-IV.b |  | No change | Clustering lost |
| MT-1799    | Mj-IV.b |  | No change | Clustering lost |
| MT-398     | Mj-IV.b |  | No change | Clustering lost |
| MT-4067    | Mj-IV.b |  | No change | Clustering lost |
| MT-4683    | Mj-IV.b |  | No change | Clustering lost |
| MT-5373    | Mj-IV.b |  | No change | Clustering lost |
| MT-5870    | Mj-IV.b |  | No change | Clustering lost |
| 62796      | Mj-IV.c |  | No change | Clustering lost |
| 63878      | Mj-IV.c |  | No change | Clustering lost |
| MT-140     | Mj-IV.c |  | No change | Clustering lost |
| MT-1499    | Mj-IV.c |  | No change | Clustering lost |
| MT-1971    | Mj-IV.c |  | No change | Clustering lost |

|            |               |           |           |           |           |           |           |                 |                 |
|------------|---------------|-----------|-----------|-----------|-----------|-----------|-----------|-----------------|-----------------|
| MT-2224    | Mj-IV.c       | Green     | No change | Clustering lost |                 |
| MT-2768    | Mj-IV.c       |           | No change | Clustering lost |                 |
| MT-441     | Mj-IV.c       |           | No change | Clustering lost |                 |
| MT-452     | Mj-IV.c       |           | No change | Clustering lost |                 |
| MT-661     | Mj-IV.c       |           | No change | Clustering lost |                 |
| MT-692     | Mj-IV.c       |           | No change | Clustering lost |                 |
| MT-853     | Mj-IV.c       |           | No change | Clustering lost |                 |
| MT-877     | Mj-IV.c       |           | No change | Clustering lost |                 |
| 58385      | Not clustered | Grey      | No change       |                 |
| 10223      | Mj-V.a        | Red       | No change | Clustering lost |                 |
| 55546      | Mj-V.a        |           | No change | Clustering lost |                 |
| 55989      | Mj-V.a        |           | No change | Clustering lost |                 |
| 60053      | Mj-V.a        |           | No change | Clustering lost |                 |
| 64334      | Mj-V.a        |           | No change | Clustering lost |                 |
| 65165      | Mj-V.a        |           | No change | Clustering lost |                 |
| 68995      | Mj-V.a        |           | No change | Clustering lost |                 |
| MT-1167    | Mj-V.a        |           | No change | Clustering lost |                 |
| MT-13-1753 | Mj-V.a        |           | No change | Clustering lost |                 |
| MT-1345    | Mj-V.a        |           | No change | Clustering lost |                 |
| MT-3296    | Mj-V.a        |           | No change | Clustering lost |                 |
| MT-393     | Mj-V.a        |           | No change | Clustering lost |                 |
| MT-4137    | Mj-V.a        |           | No change | Clustering lost |                 |
| MT-4884    | Mj-V.a        |           | No change | Clustering lost |                 |
| MT-5543    | Mj-V.a        |           | No change | Clustering lost |                 |
| MT-751     | Mj-V.a        |           | No change | Clustering lost |                 |
| 14508      | Mj-V.a        |           | No change | No change | No change | No change | Mj-V.c    | Clustering lost |                 |
| 79031      | Mj-V.b        |           | Blue      | No change       | Clustering lost |
| MT-13-2384 | Mj-V.b        |           |           | No change       | Clustering lost |
| MT-13-3209 | Mj-V.b        |           |           | No change       | Clustering lost |
| MT-131     | Mj-V.b        | No change |           | No change | No change | No change | No change | Clustering lost |                 |

|         |          |  |           |           |           |           |           |                 |
|---------|----------|--|-----------|-----------|-----------|-----------|-----------|-----------------|
| MT-2178 | Mj-V.b   |  | No change | Clustering lost |
| MT-3281 | Mj-V.b   |  | No change | Clustering lost |
| MT-4230 | Mj-V.b   |  | No change | Clustering lost |
| MT-4846 | Mj-V.b   |  | No change | Clustering lost |
| MT-5447 | Mj-V.b   |  | No change | Clustering lost |
| MT-6205 | Mj-V.b   |  | No change | Clustering lost |
| 66591   | Mj-V.c   |  | No change | Clustering lost |
| MT-2792 | Mj-V.c   |  | No change | Clustering lost |
| MT-2905 | Mj-V.c   |  | No change | Clustering lost |
| MT-2910 | Mj-V.c   |  | No change | Clustering lost |
| MT-2931 | Mj-V.c   |  | No change | Clustering lost |
| MT-3000 | Mj-V.c   |  | No change | Clustering lost |
| MT-3004 | Mj-V.c   |  | No change | Clustering lost |
| MT-3239 | Mj-V.c   |  | No change | Clustering lost |
| 15613   | Mj-V.d   |  | No change | Clustering lost |
| MT-2538 | Mj-V.d   |  | No change | Clustering lost |
| 74856   | Mj-III.a |  | No change | Clustering lost |
| 78932   | Mj-III.a |  | No change | Clustering lost |
| MT-1393 | Mj-III.a |  | No change | Clustering lost |
| MT-1549 | Mj-III.a |  | No change | Clustering lost |
| MT-1605 | Mj-III.a |  | No change | Clustering lost |
| MT-2175 | Mj-III.a |  | No change | Clustering lost |
| MT-2706 | Mj-III.a |  | No change | Clustering lost |
| MT-2720 | Mj-III.a |  | No change | Clustering lost |
| MT-2771 | Mj-III.a |  | No change | Clustering lost |
| MT-2800 | Mj-III.a |  | No change | Clustering lost |
| MT-3074 | Mj-III.a |  | No change | Clustering lost |
| MT-3255 | Mj-III.a |  | No change | Clustering lost |
| MT-3341 | Mj-III.a |  | No change | Clustering lost |
| MT-3673 | Mj-III.a |  | No change | Clustering lost |
