# Supplementary material
Source: PubMed Central journal article supplement (PMC4922084)
Supplement: JCM.00364-16_zjm999095013so6.pdf [file JCM.00364-16_zjm999095013so6.pdf]

## Supplemental references

1. **Lee RS, Radomski N, Proulx J-F, Levade I, Shapiro BJ, McIntosh F, Soualhia H, Menzies D, Behr MA.** 2015. Population genomics of *Mycobacterium tuberculosis* in the Inuit. *Proc Natl Acad Sci U S A* **112**(44):13609-13614.
2. **Tamura K.** 1992. Estimation of the number of nucleotide substitutions when there are strong transition-transversion and G+C-content biases. *Mol Biol Evol* **9**:678-687.
3. **Waddell PJ, Steel MA.** 1997. General time-reversible distances with unequal rates across sites: mixing  $\Gamma$  and inverse gaussian distributions with invariant sites. *Mol Phylogenet Evol* **8**:398-414.
4. **Richter M, Rosselló-Móra R.** 2009 Shifting the genomic gold standard for the prokaryotic species definition. *Proc Natl Acad Sci U S A* **106**(45):19126-19131.
5. **Altschul SF, Gish W, Miller W, Myers EW, Lipman DJ.** 1990. Basic local alignment search tool. *J Mol Biol* **215**:403-410.
6. **Delcher AL, Phillippy A, Carlton J, Salzberg SL.** 2002. Fast algorithms for large-scale genome alignment and comparison. *Nucleic Acids Res* **30**(11):2478-2483.
7. **Chan JZM, Halachev MR, Loman NJ, Constantinidou C, Pallen JM.** 2012. Defining bacterial species in the genomic era: insights from the genus *Acinetobacter*. *BMC Microbiol* **12**:302.
8. **Goris J, Konstantinidis KT, Klappenbach JA, Coenye T, Vandamme P, Tiedje JM.** 2007. DNA–DNA hybridization values and their relationship to whole-genome sequence similarities. *Int J Syst Evol Microbiol* **57**(1):81–91.
